# Supplementary material
Source: PubMed Central journal article supplement (PMC10026074)
Supplement: NIHMS1873582-supplement-Supplementary_Material.pdf [file NIHMS1873582-supplement-Supplementary_Material.pdf]

**Table S1.** Electronic cigarette and e-liquid characteristics

|                                        |                                                  | E-cig users <sup>a</sup> |             | Podusers <sup>b</sup> |            |
|----------------------------------------|--------------------------------------------------|--------------------------|-------------|-----------------------|------------|
|                                        |                                                  | Sole users               | Duals users | Sole users            | Dual users |
| <b>Type of e-cigarette device used</b> | 1 <sup>st</sup> gen e-cigarette                  | 0                        | 9           | NA                    | NA         |
|                                        | 2 <sup>nd</sup> /3 <sup>rd</sup> gen e-cigarette | 29                       | 35          | NA                    | NA         |
|                                        | JUUL                                             | NA                       | NA          | 12                    | 8          |
|                                        | Other pod-based e-cigarette*                     | NA                       | NA          | 11                    | 11         |
| <b>Type of flavored e-liquid used</b>  | Unflavored                                       | 0                        | 5           | 0                     | 0          |
|                                        | Tobacco                                          | 0                        | 2           | 3                     | 2          |
|                                        | Fruit                                            | 15                       | 13          | 7                     | 5          |
|                                        | Candy or other dessert                           | 5                        | 5           | 1                     | 2          |
|                                        | Vanilla                                          | 2                        | 3           | 1                     | 1          |
|                                        | Mint or menthol                                  | 4                        | 15          | 11                    | 9          |
|                                        | Other                                            | 3                        | 1           | 0                     | 0          |

\* Other brands reported include BLU, Aspire, SMOK, VUSE, Ooze, Relx and Suorin

<sup>a</sup>All e-cig users were recruited years 2014-2017

<sup>b</sup> All pod users were recruited in 2019-2020

E-cigarette = electronic cigarette

NA = not applicable

**Table S2.** Associations of pod-based electronic cigarette use with metabolic measures

|                                  | Never users | Pod users  |            | <i>p</i> -value |
|----------------------------------|-------------|------------|------------|-----------------|
|                                  |             | Sole users | Dual users |                 |
| <b>Fasting Glucose (mg/dL)</b>   | 87 ± 8      | 88 ± 11    | 88 ± 7     | 0.8753          |
| <b>Total Cholesterol (mg/dL)</b> | 148 ± 26    | 146 ± 26   | 145 ± 25   | 0.8880          |
| <b>Triglyceride (mg/dL)</b>      | 70 ± 26     | 91 ± 80    | 66 ± 43    | 0.0704          |
| <b>HDL Cholesterol (mg/dL)</b>   | 51 ± 11     | 51 ± 13    | 55 ± 15    | 0.4922          |
| <b>LDL Cholesterol (mg/dL)</b>   | 82 ± 22     | 80 ± 20    | 77 ± 20    | 0.5612          |
| <b>VLDL Cholesterol (mg/dL)</b>  | 14 ± 5      | 15 ± 7     | 13 ± 9     | 0.5875          |

Results expressed as mean ±SD

Data based on overall ANOVA
